# Supplementary material for: Optimisation of a current generation ICP-QMS and benchmarking against MC-ICP-MS spectrometry for the determination of lead isotope ratios in environmental samples
Source: Royal Society of Chemistry journal article supplement (doi:10.1039/c8ja00290h), 2018-01-01
Supplement: c8ja00290h1.pdf [file c8ja00290h1.pdf]

| Standards                            | K-factor           |                          |                          |                          |                          |
|--------------------------------------|--------------------|--------------------------|--------------------------|--------------------------|--------------------------|
|                                      |                    | $^{207}/^{206}\text{Pb}$ | $^{208}/^{207}\text{Pb}$ | $^{208}/^{204}\text{Pb}$ | $^{207}/^{204}\text{Pb}$ |
| Internal standard<br>(Tl)            | K-factor           | 0.9954                   | 0.9954                   | 0.9818                   | 0.9863                   |
|                                      | Standard deviation | 0.0003                   | 0.0003                   | 0.0011                   | 0.0009                   |
| External standard<br>(SRM-981, NIST) | K-factor           | 0.9966                   | 0.9973                   | 0.9951                   | 0.9978                   |
|                                      | Standard deviation | 0.0006                   | 0.0003                   | 0.0014                   | 0.0013                   |

Table of calculated K-factors for mass bias correction including their associated errors.
